# Supplementary material for: Cu-based MOF-derived porous carbon with highly efficient photothermal conversion performance for solar steam evaporation
Source: Royal Society of Chemistry journal article supplement (doi:10.1039/d1ta03695e), 2021-01-01
Supplement: d1ta03695e1.pdf [file d1ta03695e1.pdf]

**Supplementary Information**

**Cu-based MOF-derived porous carbon with highly efficient  
photothermal conversion performance for solar steam evaporation**

Guanyu Chen<sup>1</sup>, Zipeng Jiang<sup>2</sup>, Ang Li<sup>1\*</sup>, Xiaohong Chen<sup>1</sup>, Zhaokun Ma<sup>1</sup>, Huaihe Song<sup>1\*</sup>

1. State Key Laboratory of Chemical Resource Engineering, Beijing Key Laboratory of Electrochemical Process and Technology for Materials, Beijing University of Chemical Technology, Beijing, 100029, PR China.

2. Key Laboratory of Advanced Materials and Applied Technology for Qinghai Province, Qinghai University, Xining 810016, PR China.

\*Corresponding Author: E-mail: [songhh@mail.buct.edu.cn](mailto:songhh@mail.buct.edu.cn) (Huaihe Song),  
[li\\_ang@mail.buct.edu.cn](mailto:li_ang@mail.buct.edu.cn) (Ang Li)

### SI.1 SEM images of samples with different pyrolysis temperature and CBC-T

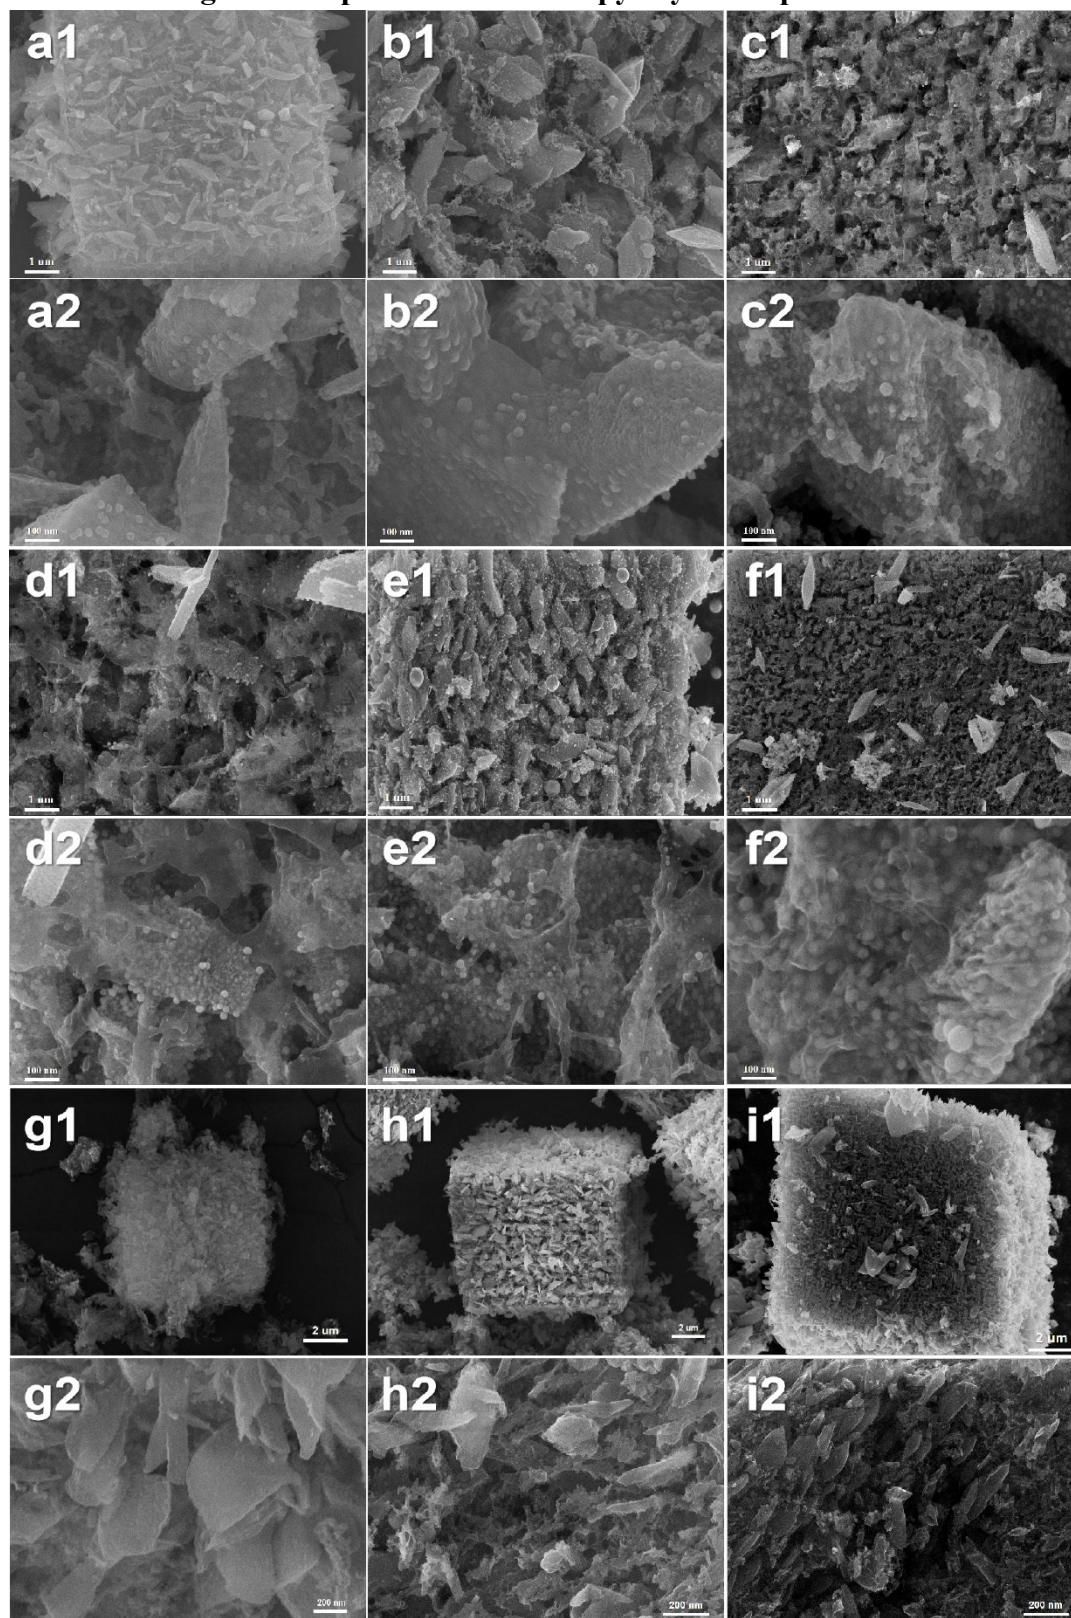

Figure S1 SEM images of Cu-BDC pyrolyzed at (a1& a2) 400°C, (b1&b2) 500°C, (c1&c2) 600°C, (d1&d2) 700°C, (e1&e2) 800°C and (f1&f2) 900°C; The morphology of (g1&g2) CBC-400, (h1&h2) CBC-600, (i1&i2) CBC-800.

### SI.2 SAED images of CBC-900

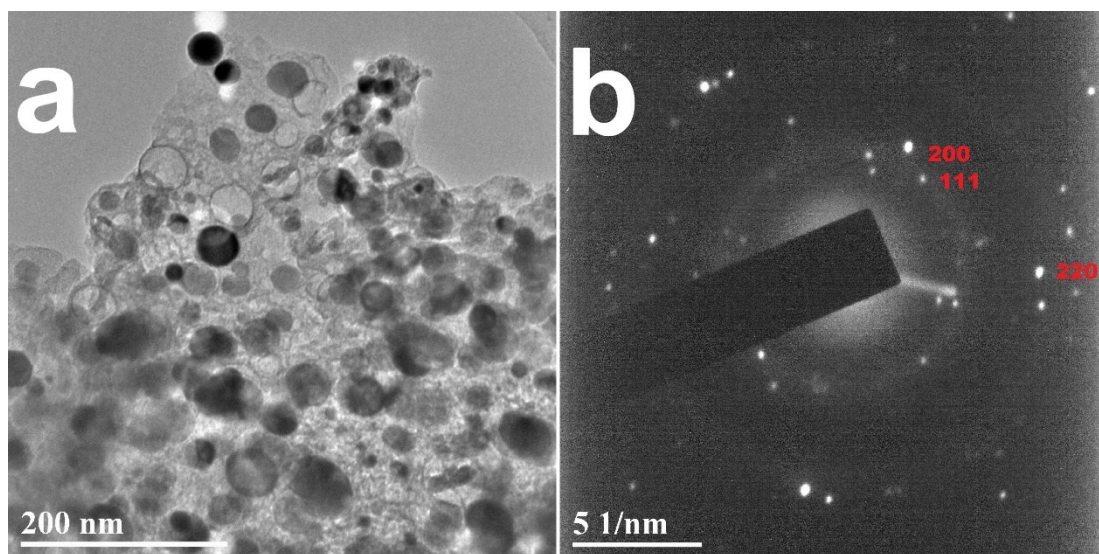

Figure S2. The HRTEM image of (a) CBC-900 without washed by ammonia and 6 M HCl and (b) the corresponding SAED image.

### SI.3 Porous property characterization of CBC-T

Table S1. Structural parameters and the Thermal Conductivity of CBC-T samples.

| Sample  | <sup>a</sup> S <sub>BET</sub><br>(m <sup>2</sup> g <sup>-1</sup> ) | <sup>b</sup> S <sub>micro</sub><br>(m <sup>2</sup> g <sup>-1</sup> ) | <sup>c</sup> S <sub>meso</sub><br>(m <sup>2</sup> g <sup>-1</sup> ) | <sup>d</sup> V <sub>total</sub><br>(cm <sup>3</sup> g <sup>-1</sup> ) | <sup>e</sup> V <sub>micro</sub><br>(cm <sup>3</sup> g <sup>-1</sup> ) | <sup>f</sup> V <sub>meso</sub><br>(cm <sup>3</sup> g <sup>-1</sup> ) | Thermal Conductivity<br>(W/mK) |
|---------|--------------------------------------------------------------------|----------------------------------------------------------------------|---------------------------------------------------------------------|-----------------------------------------------------------------------|-----------------------------------------------------------------------|----------------------------------------------------------------------|--------------------------------|
| CBC-400 | 718.9                                                              | 153.9                                                                | 565                                                                 | 1.027                                                                 | 0.064                                                                 | 0.963                                                                | 0.035                          |
| CBC-500 | 453.8                                                              | 199.3                                                                | 254.5                                                               | 0.62                                                                  | 0.09                                                                  | 0.51                                                                 | 0.035                          |
| CBC-600 | 462.3                                                              | 198.1                                                                | 264.2                                                               | 0.599                                                                 | 0.099                                                                 | 0.5                                                                  | 0.037                          |
| CBC-700 | 439.7                                                              | 128.5                                                                | 311.3                                                               | 0.522                                                                 | 0.076                                                                 | 0.348                                                                | 0.041                          |
| CBC-800 | 396.1                                                              | 119.6                                                                | 276.5                                                               | 0.565                                                                 | 0.059                                                                 | 0.419                                                                | 0.05                           |
| CBC-900 | 201.4                                                              | 45.4                                                                 | 155.97                                                              | 0.29                                                                  | 0.022                                                                 | 0.229                                                                | 0.052                          |

a Specific surface area calculated by BET method.

b Specific surface area of micropores calculated by t-plot method.

c Specific surface area of mesopores calculated by BJH method.

d Total pore volume.

e Volume of micropores.

f Volume of mesopores.

### SI.4 Structure and composition of CBC-T and the samples pyrolyzed at 300 °C and Calculation of R value of CBC-T.

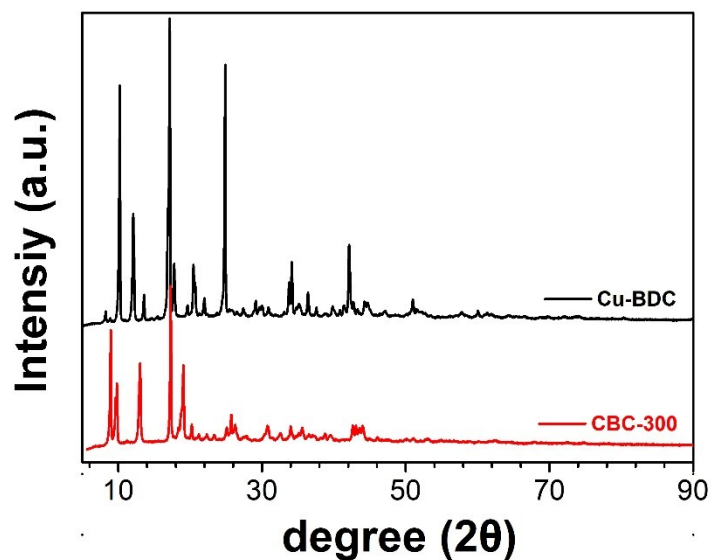

Figure S3. XRD image of CBC-300 and Cu-BDC.

With reference to the Figure S4, the background (A) is established by drawing a straight line connecting the data on either side of the peak. The peak height (B), is determined by drawing the line tangent to the linear background estimate, which intersects the (002) peak in a single point. R value is then taken to be  $B/A$ . We use this simple definition for quick and easy comparison of samples.

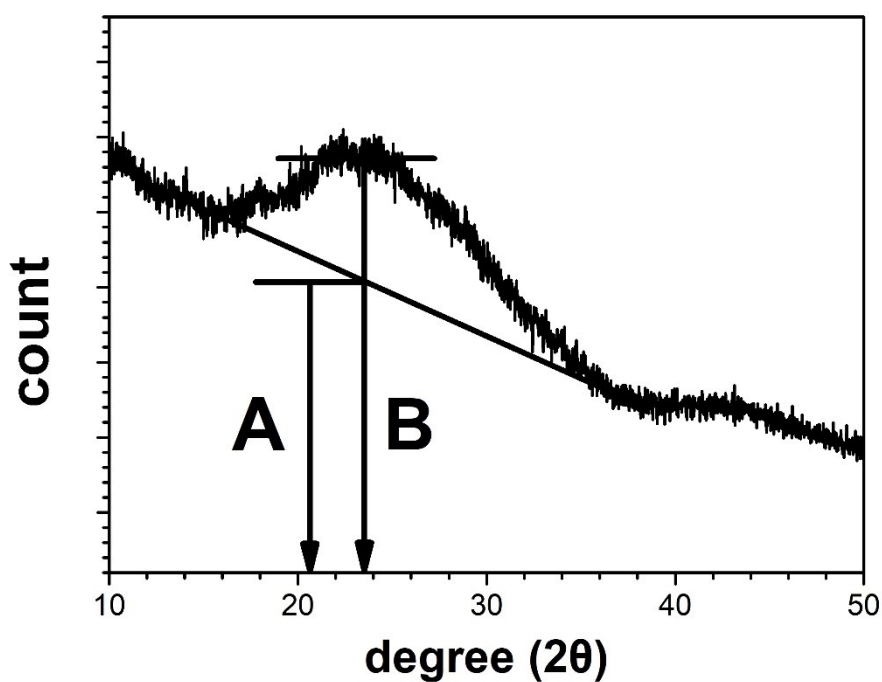

Figure S4. The empirical parameter R value is defined schematically.

## SI.5 The TG image of Cu-BDC

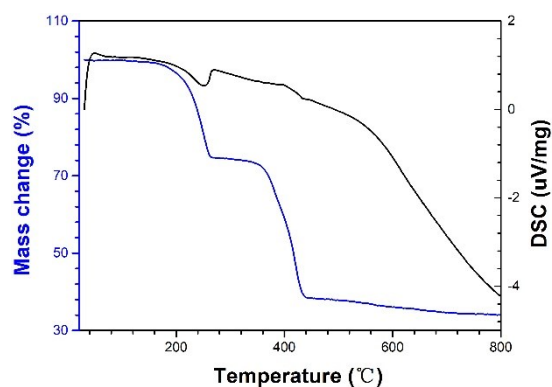

Figure S5. In situ characterization of evolution of molecular composition of the pyrolytic Cu-BDC by TG.

### SI.6 The Raman and XPS spectra of CBC-T

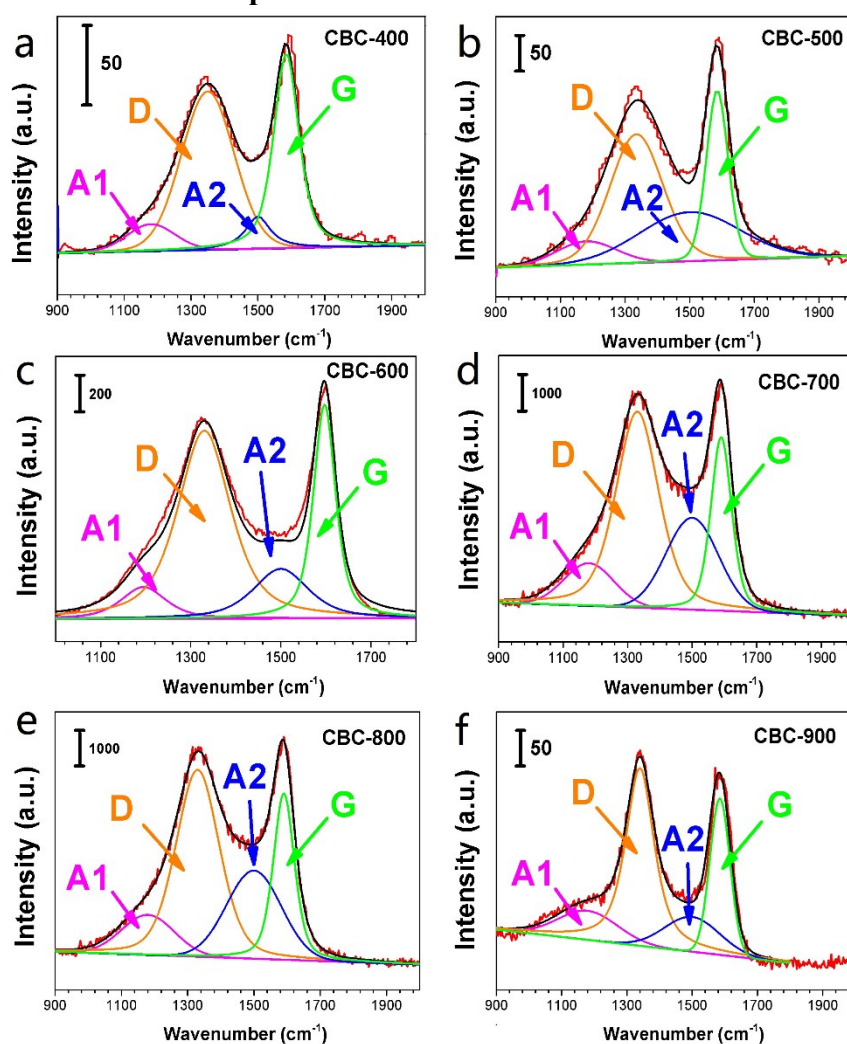

Figure S6. Raman spectra of CBC-T series products fitted with A1, D, A2 and G Gaussian peaks: (a) CBC-400, (b) CBC-500, (c) CBC-600, (d) CBC-700, (e) CBC-800 and (f) CBC-900.

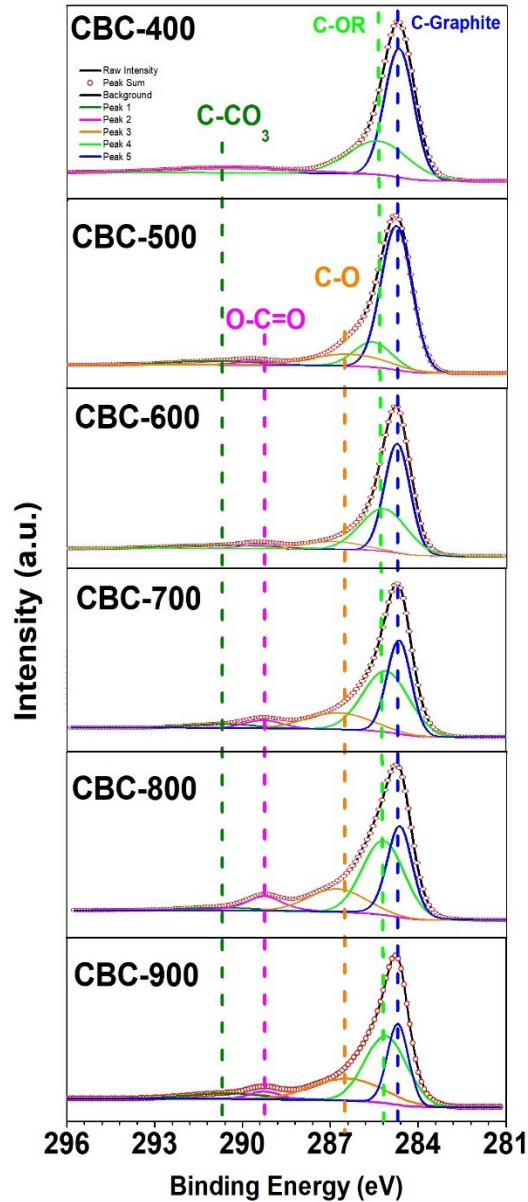

Figure S7. XPS survey corresponding high-resolution spectra of C elements of CBC-T.

### SI.7 The calculation details of XANES

The CK-edge jump at ionization potential was fitted using an error function multiplied by an exponential decay function described by the following equation<sup>1</sup> :

$$I_{step} = H \left\{ 0.5 + 0.5 \operatorname{erf} \left[ \frac{(E - P)}{W/C} \right] \right\} * \exp \left\{ - [d(E - P - W)] \right\}, E > P + W$$

Where H is the height of the function immediately above the step, E is the independent variable energy, P is the position of the inflection point of the step, W is the full width at half maximum of the step, d is the exponential decay coefficient, and C is the constant. The resulting spectrum was then fitted using multiple Gaussian peaks.<sup>2</sup>

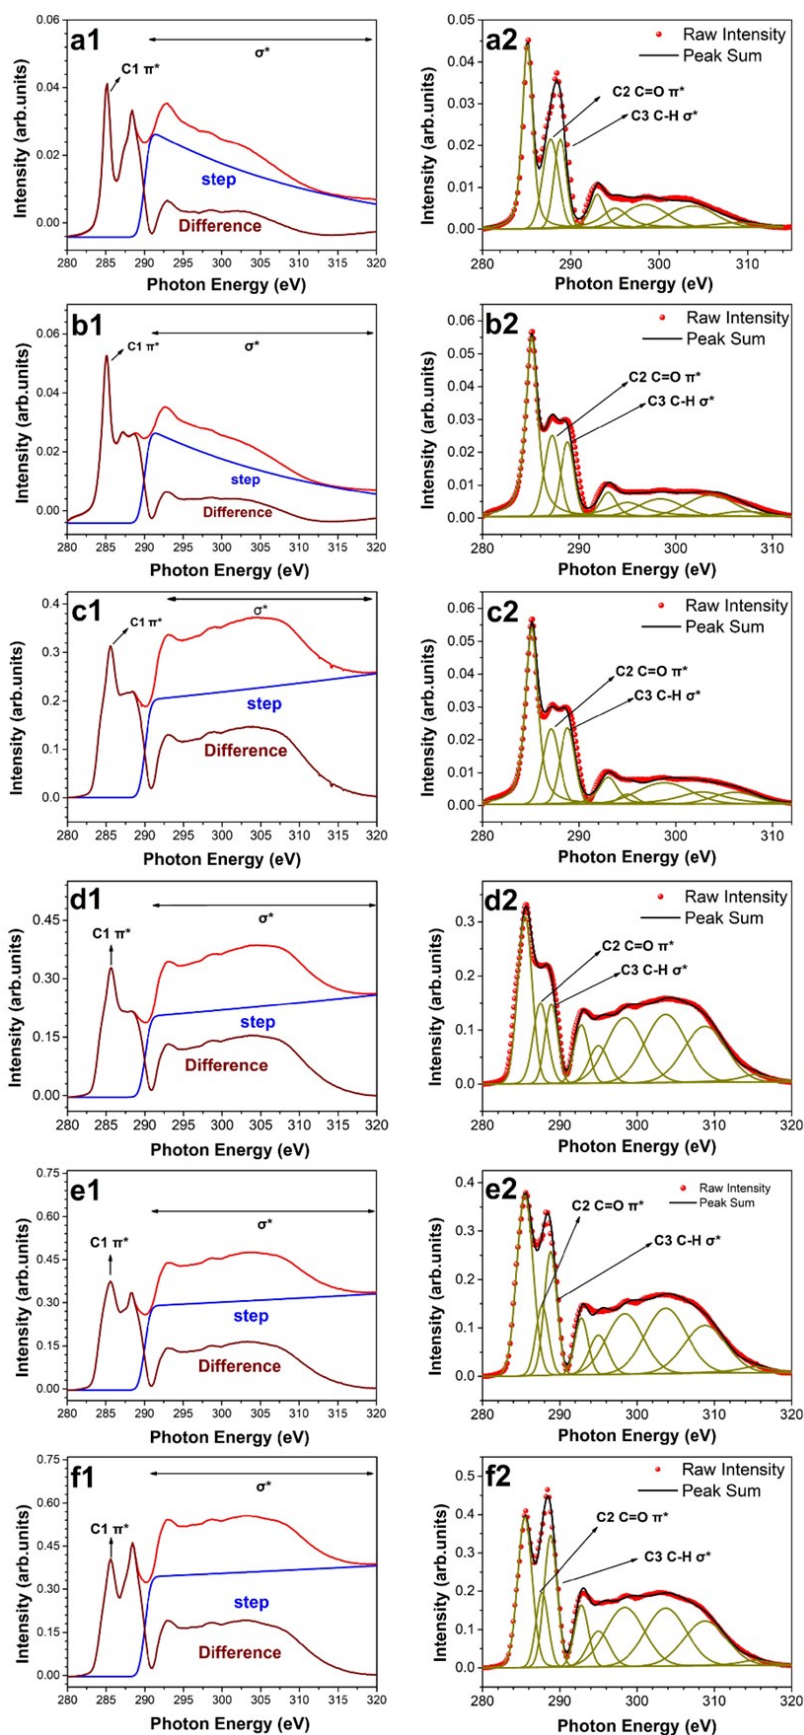

Figure S8. Deconvolution of XANES spectra of (a1&a2) CBC-400; (b1&b2) CBC-500; (c1&c2) CBC-600; (d1&d2) CBC-700; (e1&e2) CBC-800; (f1&f2) CBC-900.

### SI.8 The UV-Vis image of CBC-T

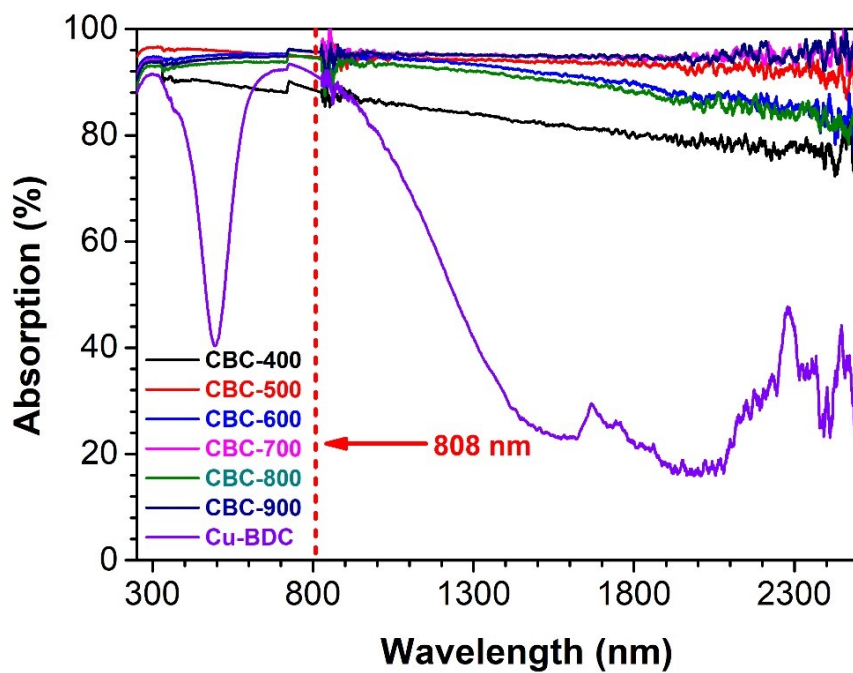

Figure S9. The Absorption image of CBC-T and Cu-BDC.

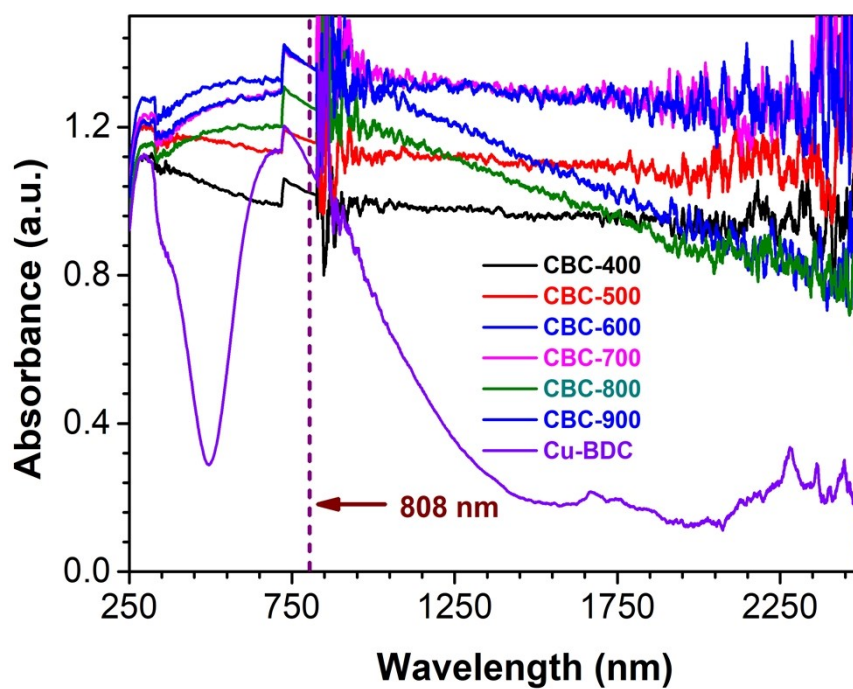

Figure S10. The Absorbance image of CBC-T and Cu-BDC.



### SI.9 Calculation of photothermal conversion efficiency of CBC-T

The photothermal conversion efficiency was determined according to previous method.[8,16,17,29]

Details are as follows:

Based on the total energy balance for this system:

$$\sum_i m_i C_{p,i} \frac{dT}{dt} = Q_s - Q_{loss}$$

where  $m_i$  (0.35 g) and  $C_{p,i}$  ( $0.8 \text{ J (g } ^\circ\text{C)}^{-1}$ ) are the mass and heat capacity of system components (Cu-BDC and CBC-T samples and quartz glass), respectively.  $Q_s$  is the photothermal heat energy input by irradiating NIR laser to the samples, and  $Q_{loss}$  is thermal energy lost to the surroundings.

When the temperature is maximum, the system is in balance:

$$Q_s = Q_{loss} = hS \Delta T_{max}$$

where  $h$  is heat transfer coefficient,  $S$  is the surface area of the container,  $\Delta T_{max}$  is the maximum temperature change. The photothermal conversion efficiency  $\eta$  is calculated from the following equation:

$$\eta = \frac{hS \Delta T_{max}}{I(1 - 10^{-A_{808}})}$$

where  $I$  is the laser power ( $0.8 \text{ W cm}^{-2}$ ) and  $A_{808}$  is the absorbance of the samples at the wavelength of 808 nm (as showed in Figure S5).

In order to obtain the  $hS$ , a dimensionless driving force temperature,  $\theta$  is introduced as follows:

$$\theta = \frac{T - T_{surr}}{T_{surr}^{max}}$$

where  $T$  is the temperature of the sample,  $T_{max}$  is the maximum system temperature, and  $T_{surr}$  is the initial temperature (about  $33 \text{ }^\circ\text{C}$ ).

The sample system time constant  $\tau_s$ ,

$$\tau_s = \frac{\sum_i m_i C_{p,i}}{hS}$$

$$\frac{d\theta}{dt} = \frac{1}{\tau_s} \frac{Q_s}{hS \Delta T_{max} \theta}$$

thus

when the laser is off,  $Q_s = 0$ , therefore  $\frac{d\theta}{dt} = -\frac{\theta}{\tau_s}$ , and  $t = -\tau_s \ln \theta$

so  $hS$  could be calculated from the slope of cooling time vs  $\ln \theta$ . Therefore,  $\tau_s$  is about 280s.

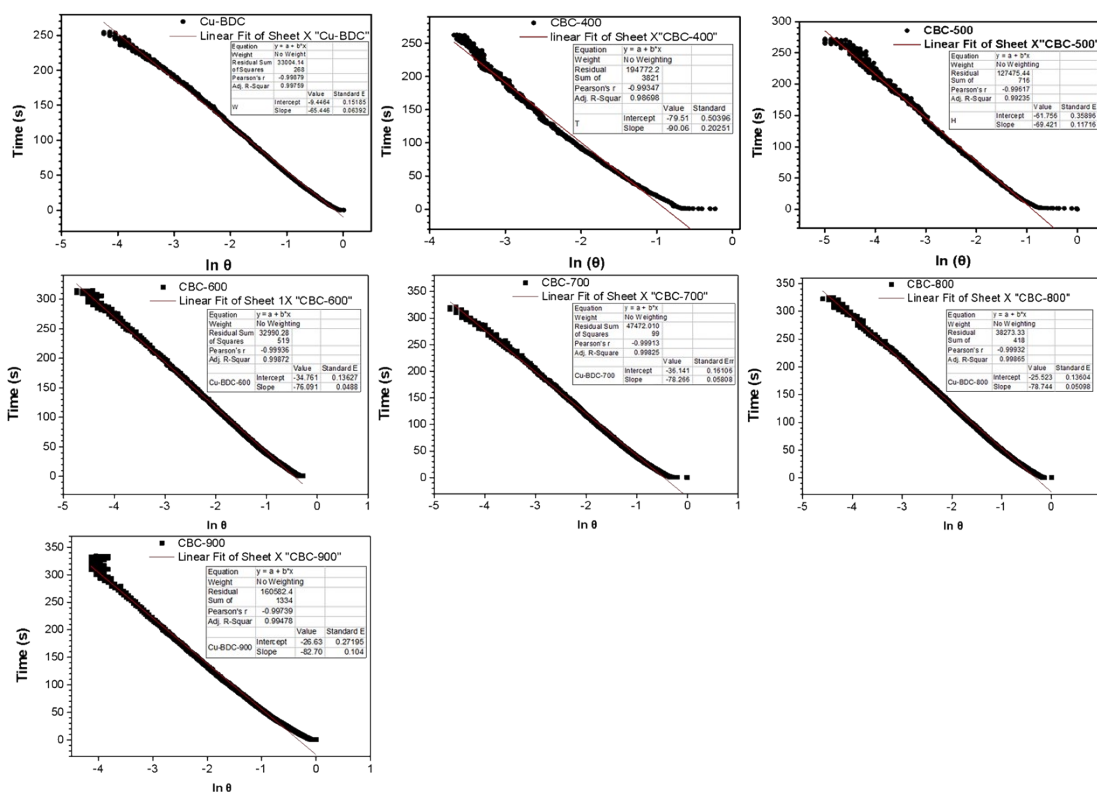

Figure S11. corresponding time- $\ln \theta$  linear curve of CBC-T.

Table S2. Comparison of the photothermal efficiency ( $\eta$ ) among CBC-T.

| sample  | Max temperature difference ( $^{\circ}\text{C}$ ) | $\eta$ (%) |
|---------|---------------------------------------------------|------------|
| Cu-BDC  | 62                                                | 36.34      |
| CBC-400 | 110                                               | 48.31      |
| CBC-500 | 118                                               | 64.42      |
| CBC-600 | 91                                                | 43.78      |
| CBC-700 | 86                                                | 40.31      |
| CBC-800 | 78                                                | 36.62      |
| CBC-900 | 67                                                | 29.51      |

Table S3. Photothermal conversion efficiency with different concentrations.

| Contrast Sample       | $\eta$ (%) | Classification | Ref. |
|-----------------------|------------|----------------|------|
| CNT                   | 44.8       | carbon         | 3    |
| Carbon Nanospheres    | 46.3       | carbon         | 4    |
| Carbon dots           | 43.9       | carbon         | 5    |
| Graphene Quantum Dots | 87.9       | carbon         | 6    |
| Porous Carbon         | 48.5       | carbon         | 7    |

| CBC-500                                          | 64.42 | carbon          | Our Work |
|--------------------------------------------------|-------|-----------------|----------|
| Perylenediimide-MOF                              | 52.3  | complex         | 8        |
| Quaterylenediimide                               | 62.4  | organic         | 9        |
| nanoparticles                                    | 54.9  | organic         | 10       |
| perylene bisimide                                | 59.5  | organic         | 11       |
| Dopamine-Melanin Colloidal Nanosphere            | 40    | organic         | 12       |
| Nanofibers                                       | 22.36 | organic         | 13       |
| Perylene diimide                                 | 31.6  | organic         | 14       |
| Terylenediimide-Based material                   | 41    | organic         | 15       |
| Organic cocrystal                                | 18.8  | organic         | 16       |
| Poly(3,4-ethylenedioxyphenylene)                 | 42.5  | polymer         | 17       |
| polymer nanoparticles                            | 50    | polymer         | 18       |
| MOF                                              | 21.6  | inorganic       | 19       |
| MOF                                              | 33    | inorganic       | 20       |
| Chalcogenide                                     | 35    | inorganic       | 21       |
| Copper Selenide Nanocrystals                     | 22    | inorganic       | 22       |
| gold nanoshells                                  | 13    | metal           | 22       |
| gold nanorods                                    | 21    | metal           | 22       |
| Cu <sub>9</sub> S <sub>5</sub>                   | 25.7  | Metal composite | 23       |
| Cu <sub>7</sub> S <sub>4</sub> Nanosuperlattices | 65.7  | Metal composite | 24       |
| Cu <sub>7,2</sub> S <sub>4</sub> nanocrystals    | 56.7  | Metal composite | 25       |
| Bi <sub>2</sub> S <sub>3</sub> -Au               | 51.6  | Metal composite | 26       |
| Au - Cu <sub>9</sub> S <sub>5</sub>              | 37    | Metal composite | 27       |
| W <sub>18</sub> O <sub>49</sub>                  | 59.6  | Metal oxide     | 28       |

## SI.10 The SEM image of evaporator devices

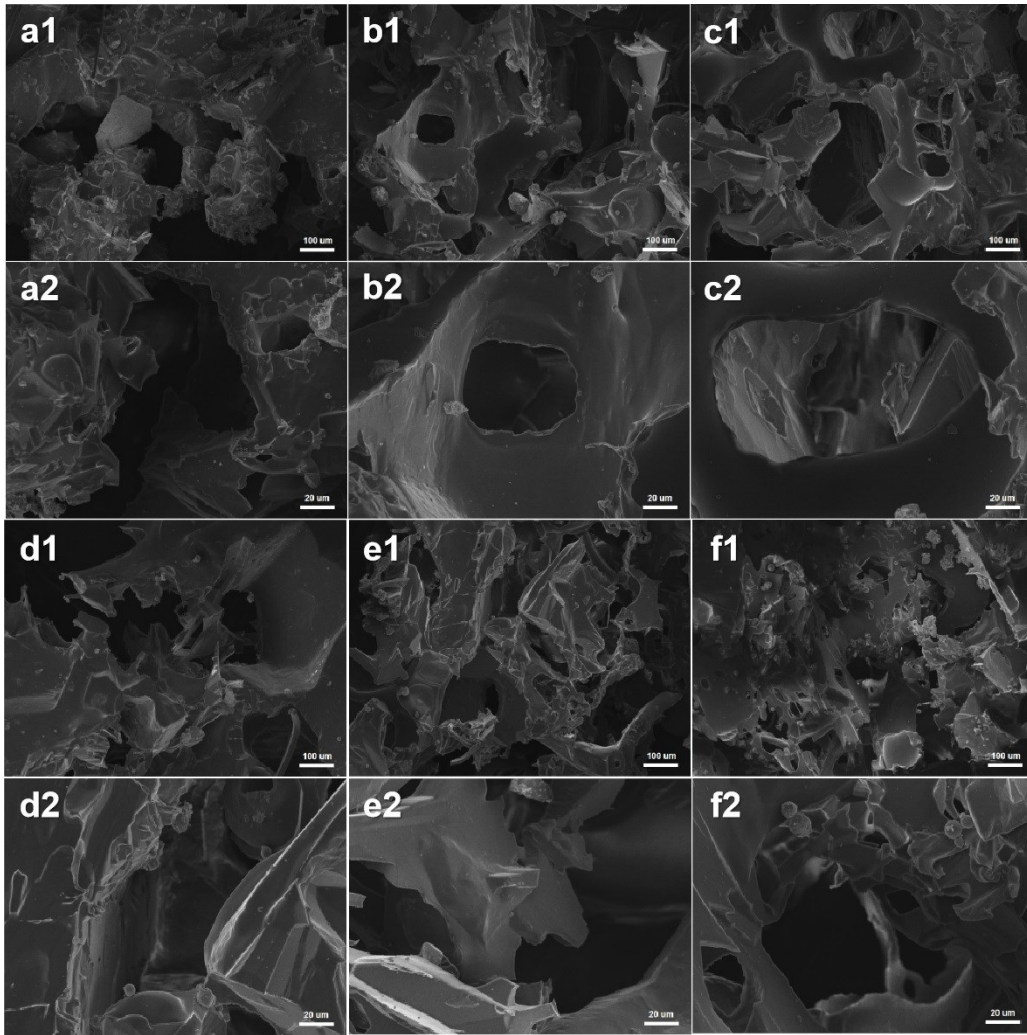

Figure S12. SEM image of (a) pure PDMS, (b) CBC-500-0.1%, (c) CBC-500-0.2%,(d) CBC-500-0.5%, (e) CBC-500-0.1% and (f) CBC-500-0.1%.

### SI.11 The analysis of heat loss:

Heat loss to the environment includes three parts: (i)heat radiation to air, (ii)heat convection to air and (iii)heat conduction to water. The heat loss is calculated as follow:

Radiation:

The radiation loss was calculated using the Stefan-Boltzmann equation :

$$\phi = \epsilon A \sigma (T_1^4 - T_2^4)$$

where  $\phi$  represents heat flux,  $\epsilon$  is the emissivity, and emissivity in this equation is supposed has a maximum emissivity of 1.  $A$  is the surface area ( $m^2$ ),  $\sigma$  is the StefanBoltzmann constant ( $5.67 \times 10^{-8} W m^{-2} K^{-4}$ ),  $T_1$  is the surface temperature ( $37^\circ C$ ) of heterostructured membrane-based absorber at a steady state condition, and  $T_2$  is the ambient temperature ( $27^\circ C$ ) upward the absorber. According to the equation, the radiation heat loss is calculated 6%.

Convection:

The convective heat loss is defined by Newton' law of cooling:

$$Q = hA\Delta T$$

where Q represents the heat energy, h is the convection heat transfer coefficient ( $1 \text{ W m}^{-2} \text{ K}$ ), and  $\Delta T$  ( $10 \text{ }^\circ\text{C}$ ) is different value between the surface temperature of heterostructured membrane-based absorber and the ambient temperature upward the absorber. According to the equation, the connection heat loss is measured 4%.

Conduction:

$$Q = Cm\Delta T$$

where Q is the heat energy, C is the specific heat capacity of water ( $4.2 \text{ kJ }^\circ\text{C}^{-1} \text{ kg}^{-1}$ ), m (50 g) is the weight of pure water used in this experiment.  $\Delta T$  is the temperature difference of pure water after and before solar illumination under 1 sun after 1 h ( $0.5 \text{ }^\circ\text{C}$ ). The conduction loss was calculated about 7%.

### SI.12 The analysis of contact angle

The contact angle measurement was tested by KRUSS DSA 100.

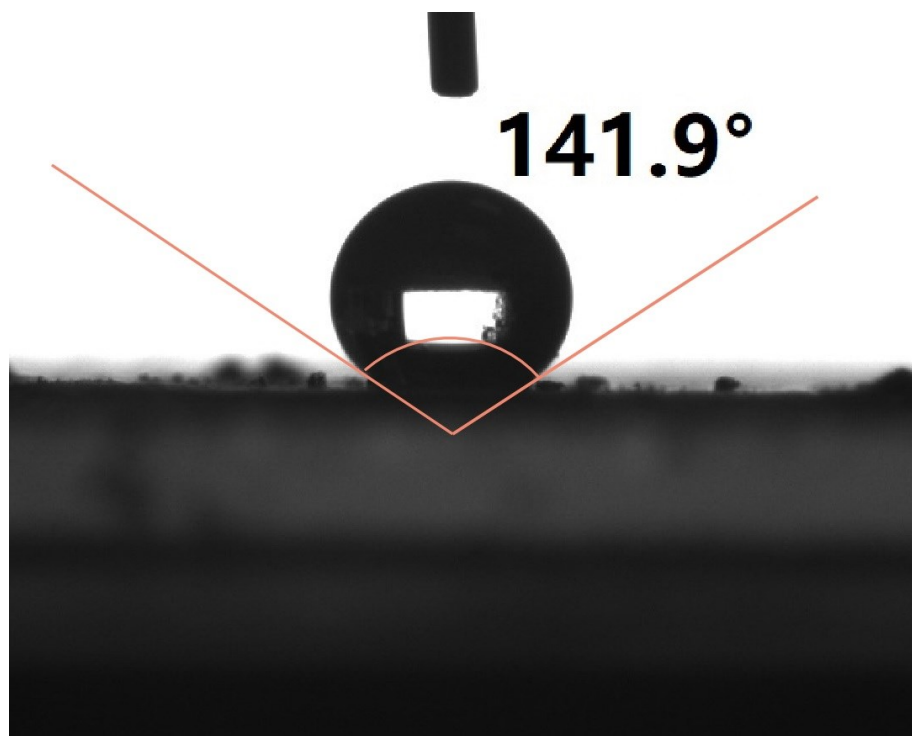

Figure S13. Surface wetting property of CBC-500.

### SI.13 The analysis of recycle test

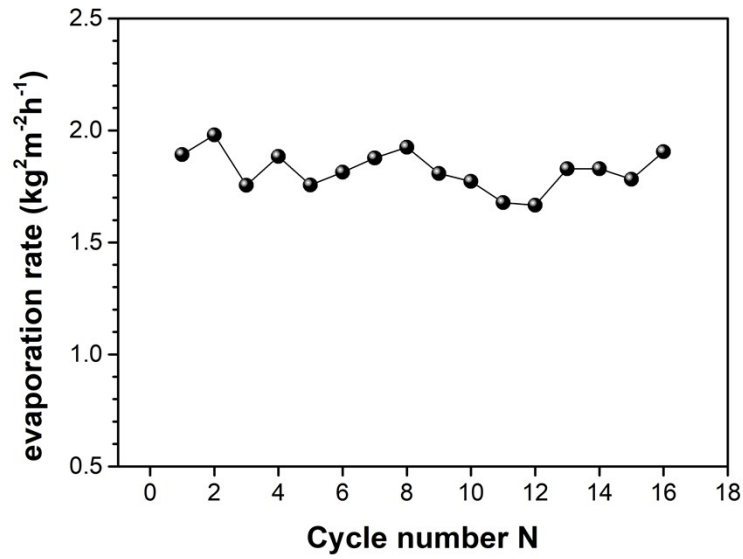

Figure S14. The stability of the evaporator under 1 sun illumination over sixteen cycles of evaporation.

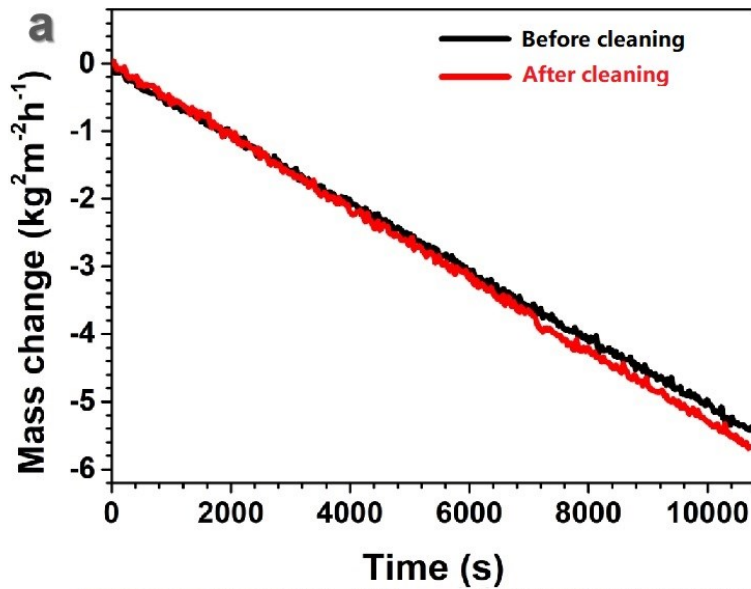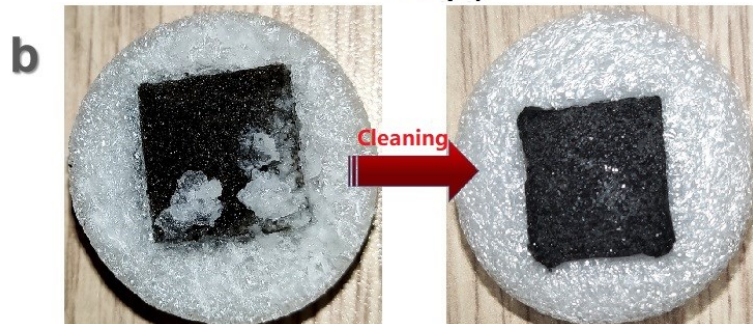

Figure S15. (a) The rate of evaporation before and after the evaporator is washed. (b) surface solid accumulation after the seawater evaporation and the evaporator after the salt removal by hand washing.

### SI.14 The Stability of samples before and after illumination

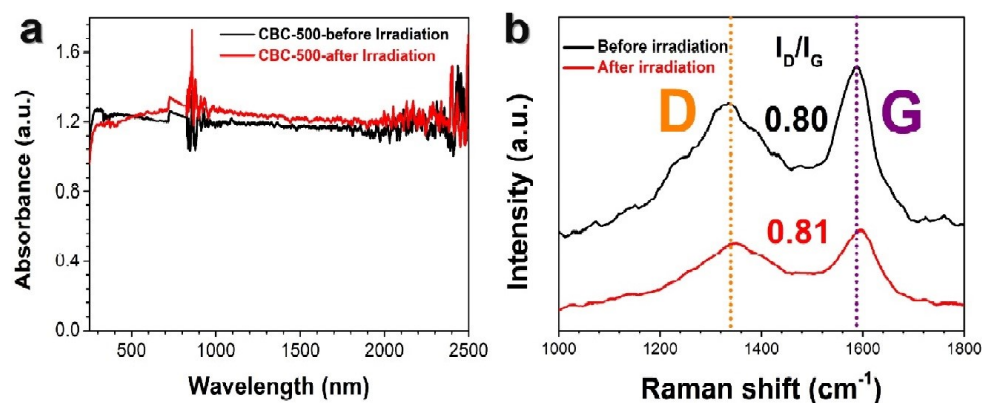

Figure S16. (a) The absorbance value of the CBC-500 changes before and after sunlight irradiation. (b) The Raman spectrum of the sample changes before and after sunlight irradiation.

## Reference

- 1 N. Soin, S.S. Roy, S.C. Ray, P. Lemoine, M.A. Rahman, P.D. Maguire, S.K. Mitra, J.A. McLaughlin, *Thin Solid Films*, 2012, 520, 2909-2915.
- 2 R. Gago, I. Jiménez, J.M. Albella, *Surf. Sci.*, 2001, 482, 530-536.
- 3 X. Du, J. Xu, S. Deng, Z. Du, X. Cheng, H. Wang, *ACS Sustain. Chem. Eng.*, 2019, 7, 17682-17690.
- 4 L. Zhou, Y. Jing, Y. Liu, Z. Liu, D. Gao, H. Chen, W. Song, T. Wang, X. Fang, W. Qin, Z. Yuan, S. Dai, Z.-A. Qiao, C. Wu, *Theranostics*, 2018, 8, 663-675.
- 5 W. Su, H. Wu, H. Xu, Y. Zhang, Y. Li, X. Li, L. Fan, *Mater. Chem. Front.*, 2020, 4, 821-836.
- 6 S. Li, S. Zhou, Y. Li, X. Li, J. Zhu, L. Fan, S. Yang, *ACS Appl. Mater. Interfaces*, 2017, 9, 22332-22341.
- 7 Y. Weng, S. Guan, L. Wang, H. Lu, X. Meng, G.I.N. Waterhouse, S. Zhou, *Small*, 2020, 16, 1905184.
- 8 B. Lü, Y. Chen, P. Li, B. Wang, K. Müllen, M. Yin, *Nat. Commun.*, 2019, 10, 767.
- 9 C. Liu, S. Zhang, J. Li, J. Wei, K. Müllen, M. Yin, *A Water-Soluble*, *Angew. Chem. Int. Ed.*, 2019, 58, 1638-1642.
- 10 Z. Zhao, C. Chen, W. Wu, F. Wang, L. Du, X. Zhang, Y. Xiong, X. He, Y. Cai, R.T.K. Kwok, J.W.Y. Lam, X. Gao, P. Sun, D.L. Phillips, D. Ding, B.Z. Tang, *Nat. Commun.*, 2019, 10, 768.
- 11 L. Cui, Y. Jiao, A. Wang, L. Zhao, Q. Dong, X. Yan, S. Bai, *Chem. Commun.*, 2018, 54, 2208-2211.
- 12 Y. Liu, K. Ai, J. Liu, M. Deng, Y. He, L. Lu, *Adv. Mater.*, 2013, 25, 1353-1359.
- 13 Y. Jiao, K. Liu, G. Wang, Y. Wang, X. Zhang, *Chem. Sci.*, 2015, 6, 3975-3980.
- 14 S. Zhang, W. Guo, J. Wei, C. Li, X.-J. Liang, M. Yin, *ACS Nano*, 2017, 11, 3797-3805.
- 15 Y. Wang, W. Zhu, W. Du, X. Liu, X. Zhang, H. Dong, W. Hu, *Angew. Chem. Int. Ed.*, 2018, 57, 3963-3967.
- 16 B. Kim, H. Shin, T. Park, H. Lim, E. Kim, *Adv. Mater.*, 2013, 25, 5483-5489.

- 17 H. Chen, J. Zhang, K. Chang, X. Men, X. Fang, L. Zhou, D. Li, D. Gao, S. Yin, X. Zhang, Z. Yuan, C. Wu, *Biomaterials*, 2017, 144, 42-52.
- 18 W. Wang, L. Wang, Y. Li, S. Liu, Z. Xie, X. Jing, *Adv. Mater.*, 2016, 28, 9320-9325.
- 19 S. Wang, L. Shang, L. Li, Y. Yu, C. Chi, K. Wang, J. Zhang, R. Shi, H. Shen, G. I. N. Waterhouse, S. Liu, J. Tian, T. Zhang, H. Liu, *Adv. Mater.*, 2016, 28, 8379-8387.
- 20 H. Zhu, Z. Lai, Y. Fang, X. Zhen, C. Tan, X. Qi, D. Ding, P. Chen, H. Zhang, K. Pu, *Small*, 2017, 13, 1604139.
- 21 C.M. Hessel, V.P. Pattani, M. Rasch, M.G. Panthani, B. Koo, J.W. Tunnell, B.A. Korgel, *Nano Lett.*, 2011, 11, 2560-2566.
- 22 Q. Tian, F. Jiang, R. Zou, Q. Liu, Z. Chen, M. Zhu, S. Yang, J. Wang, J. Wang, J. Hu, *ACS Nano*, 2011, 5, 9761-9771.
- 23 J. Cui, R. Jiang, S. Xu, G. Hu, L. Wang, *Small*, 2015, 11, 4183-4190.
- 24 B. Li, Q. Wang, R. Zou, X. Liu, K. Xu, W. Li, J. Hu, *Nanoscale*, 2014, 6, 3274-3282.
- 25 Y. Cheng, Y. Chang, Y. Feng, H. Jian, Z. Tang, H. Zhang, *Angew. Chem. Int. Ed.*, 2018, 57, 246-251.
- 26 X. Ding, C.H. Liow, M. Zhang, R. Huang, C. Li, H. Shen, M. Liu, Y. Zou, N. Gao, Z. Zhang, Y. Li, Q. Wang, S. Li, J. Jiang, *J. Am. Chem. Soc.*, 2014, 136, 15684-15693.
- 27 Z. Fang, S. Jiao, Y. Kang, G. Pang, S. Feng, *ChemistryOpen*, 2017, 6, 261-265.
